# Supplementary material for: A detailed study of cholinium chloride and levulinic acid deep eutectic solvent system for CO2capture via experimental and molecular simulation approaches
Source: Royal Society of Chemistry journal article supplement (doi:10.1039/c5cp03364k), 2015-01-01
Supplement: c5cp03364k1.pdf [file c5cp03364k1.pdf]

## **A Detailed Study of Cholinium Chloride and Levulinic Acid Deep Eutectic Solvent System for CO<sub>2</sub> Capture via Experimental and Molecular Simulation Approaches**

Ruh Ullah,<sup>a</sup> Mert Atilhan,<sup>a\*</sup> Baraa Anaya,<sup>a</sup> Gregorio García,<sup>b</sup> Ahmed ElKhattat,<sup>a</sup> Mohammad Tariq,<sup>a</sup> and Santiago Aparicio<sup>b\*</sup>

<sup>a</sup>Department of Chemical Engineering, Qatar University, P.O. Box 2713, Doha, Qatar

<sup>b</sup>Department of Chemistry, University of Burgos, 09001 Burgos, Spain

\*Corresponding authors: [mert.atilhan@qu.edu.qa](mailto:mert.atilhan@qu.edu.qa) (M. A.) and [sapar@ubu.es](mailto:sapar@ubu.es) (S. A.)

### **Electronic Supplementary Information**

**Table S1. Forcefield parameterization for compounds studied in this work.**

The general form of the applied force field is:

$$E = \sum_{bonds} k_r (r - r_{eq})^2 + \sum_{angles} k_\theta (\theta - \theta_{eq})^2 + E_{tor} \\ + \sum_i \sum_j \left\{ 4\epsilon_{ij} \left[ \left( \frac{\sigma_{ij}}{r_{ij}} \right)^{12} - \left( \frac{\sigma_{ij}}{r_{ij}} \right)^6 \right] + \frac{q_i q_j e^2}{4\pi\epsilon_0 r_{ij}} \right\}$$

Dihedrals ( $E_{tor}$ ) were described according to:

$$E_{tor} = \sum_{torsions} k_\phi (1 + \cos(m\phi - \delta))$$

Improper dihedrals were described according to:

$$E_{improper} = k_\phi (\phi - \phi_0)^2$$

---

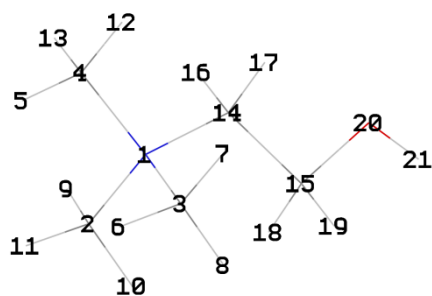

[CH]<sup>+</sup>

| #  | q         | $\sigma_{ii} / \text{\AA}$ | $\epsilon_{ii} / \text{kJ mol}^{-1}$ |
|----|-----------|----------------------------|--------------------------------------|
| 1  | 0.362364  | 3.1000                     | 0.8370                               |
| 2  | -0.218014 | 3.4500                     | 0.3350                               |
| 3  | -0.295250 | 3.4500                     | 0.3350                               |
| 4  | -0.404630 | 3.4500                     | 0.3350                               |
| 5  | 0.169077  | 2.2100                     | 0.0920                               |
| 6  | 0.151459  | 2.2100                     | 0.0920                               |
| 7  | 0.107947  | 2.2100                     | 0.0920                               |
| 8  | 0.177096  | 2.2100                     | 0.0920                               |
| 9  | 0.120926  | 2.2100                     | 0.0920                               |
| 10 | 0.161115  | 2.2100                     | 0.0920                               |
| 11 | 0.105308  | 2.2100                     | 0.0920                               |
| 12 | 0.145579  | 2.2100                     | 0.0920                               |
| 13 | 0.148409  | 2.2100                     | 0.0920                               |
| 14 | -0.192072 | 3.6400                     | 0.2300                               |
| 15 | 0.546587  | 3.6400                     | 0.2300                               |
| 16 | 0.064004  | 2.2100                     | 0.0920                               |
| 17 | 0.107567  | 2.2100                     | 0.0920                               |
| 18 | -0.073028 | 0.0000                     | 0.0200                               |
| 19 | -0.029581 | 0.0000                     | 0.0200                               |
| 20 | -0.733393 | 3.1538                     | 0.6364                               |
| 21 | 0.403941  | 0.4000                     | 0.1925                               |

# Bonds

| Atom Numbers | $r_{eq} / \text{\AA}$ | $k_r / \text{kJ mol}^{-1} \text{\AA}^{-2}$ |
|--------------|-----------------------|--------------------------------------------|
| 1 2          | 1.5100                | 1092.80                                    |
| 1 3          | 1.5100                | 1092.80                                    |
| 1 14         | 1.5320                | 1092.80                                    |
| 1 4          | 1.5100                | 1092.80                                    |
| 2 9          | 1.0890                | 1422.56                                    |
| 2 10         | 1.0890                | 1422.56                                    |
| 2 11         | 1.0890                | 1422.56                                    |
| 3 6          | 1.0890                | 1422.56                                    |
| 3 7          | 1.0890                | 1422.56                                    |
| 3 8          | 1.0890                | 1422.56                                    |
| 4 5          | 1.0890                | 1422.56                                    |
| 4 12         | 1.0890                | 1422.56                                    |
| 4 13         | 1.0890                | 1422.56                                    |
| 14 15        | 1.5200                | 931.60                                     |
| 14 16        | 1.0910                | 1422.56                                    |
| 14 17        | 1.0910                | 1422.56                                    |
| 15 18        | 1.0960                | 1422.56                                    |
| 15 19        | 1.0960                | 1422.56                                    |
| 15 20        | 1.4180                | 1792.00                                    |
| 20 21        | 0.9650                | 2313.80                                    |

# Angles

| Atom Numbers | $\theta_{eq} / \text{deg}$ | $k_{\theta} / \text{kJ mol}^{-1} \text{rad}^{-2}$ |
|--------------|----------------------------|---------------------------------------------------|
| 2 1 3        | 108.9000                   | 209.30                                            |
| 2 1 14       | 110.7000                   | 209.30                                            |
| 2 1 4        | 108.9000                   | 209.30                                            |
| 3 1 14       | 110.7000                   | 209.30                                            |

|    |    |    |          |        |
|----|----|----|----------|--------|
| 3  | 1  | 4  | 108.9000 | 209.30 |
| 14 | 1  | 4  | 110.7000 | 209.30 |
| 1  | 2  | 10 | 109.0000 | 201.00 |
| 1  | 2  | 11 | 109.0000 | 201.00 |
| 1  | 2  | 9  | 109.0000 | 201.00 |
| 10 | 2  | 11 | 109.3000 | 148.60 |
| 10 | 2  | 9  | 109.3000 | 148.60 |
| 11 | 2  | 9  | 109.3000 | 148.60 |
| 1  | 3  | 8  | 109.0000 | 201.00 |
| 1  | 3  | 7  | 109.0000 | 201.00 |
| 1  | 3  | 6  | 109.0000 | 201.00 |
| 8  | 3  | 7  | 109.3000 | 148.60 |
| 8  | 3  | 6  | 109.3000 | 148.60 |
| 7  | 3  | 6  | 109.3000 | 148.60 |
| 1  | 4  | 13 | 109.0000 | 201.00 |
| 1  | 4  | 12 | 109.0000 | 201.00 |
| 1  | 4  | 5  | 109.0000 | 201.00 |
| 13 | 4  | 12 | 109.3000 | 148.60 |
| 13 | 4  | 5  | 109.3000 | 148.60 |
| 12 | 4  | 5  | 109.3000 | 148.60 |
| 1  | 14 | 15 | 110.6000 | 334.90 |
| 1  | 14 | 16 | 106.2000 | 215.60 |
| 1  | 14 | 17 | 106.2000 | 215.60 |
| 15 | 14 | 16 | 110.6000 | 110.90 |
| 15 | 14 | 17 | 110.6000 | 110.90 |
| 16 | 14 | 17 | 108.4000 | 148.60 |
| 14 | 15 | 18 | 105.8000 | 148.60 |
| 14 | 15 | 19 | 105.8000 | 148.60 |
| 14 | 15 | 20 | 109.4000 | 316.90 |
| 18 | 15 | 19 | 107.2000 | 148.60 |
| 18 | 15 | 20 | 111.8000 | 192.20 |
| 19 | 15 | 20 | 111.8000 | 192.20 |
| 15 | 20 | 21 | 111.9000 | 240.70 |

# Dihedrals

|    | Atom Numbers |    |    | $\delta$ / deg | $k_{\phi}$ / kJ mol <sup>-1</sup> | m |
|----|--------------|----|----|----------------|-----------------------------------|---|
| 3  | 1            | 2  | 10 | 0.00           | 0.335                             | 3 |
| 3  | 1            | 2  | 11 | 0.00           | 0.335                             | 3 |
| 3  | 1            | 2  | 9  | 0.00           | 0.335                             | 3 |
| 14 | 1            | 2  | 10 | 0.00           | 0.335                             | 3 |
| 14 | 1            | 2  | 11 | 0.00           | 0.335                             | 3 |
| 14 | 1            | 2  | 9  | 0.00           | 0.335                             | 3 |
| 4  | 1            | 2  | 10 | 0.00           | 0.335                             | 3 |
| 4  | 1            | 2  | 11 | 0.00           | 0.335                             | 3 |
| 4  | 1            | 2  | 9  | 0.00           | 0.335                             | 3 |
| 2  | 1            | 3  | 8  | 0.00           | 0.335                             | 3 |
| 2  | 1            | 3  | 7  | 0.00           | 0.335                             | 3 |
| 2  | 1            | 3  | 6  | 0.00           | 0.335                             | 3 |
| 14 | 1            | 3  | 8  | 0.00           | 0.335                             | 3 |
| 14 | 1            | 3  | 7  | 0.00           | 0.335                             | 3 |
| 14 | 1            | 3  | 6  | 0.00           | 0.335                             | 3 |
| 4  | 1            | 3  | 8  | 0.00           | 0.335                             | 3 |
| 4  | 1            | 3  | 7  | 0.00           | 0.335                             | 3 |
| 4  | 1            | 3  | 6  | 0.00           | 0.335                             | 3 |
| 2  | 1            | 14 | 15 | 180.00         | 10.500                            | 3 |
| 2  | 1            | 14 | 16 | 0.00           | 0.335                             | 3 |
| 2  | 1            | 14 | 17 | 0.00           | 0.335                             | 3 |
| 3  | 1            | 14 | 15 | 180.00         | 10.500                            | 3 |
| 3  | 1            | 14 | 16 | 0.00           | 0.335                             | 3 |
| 3  | 1            | 14 | 17 | 0.00           | 0.335                             | 3 |
| 4  | 1            | 14 | 15 | 180.00         | 10.500                            | 3 |
| 4  | 1            | 14 | 16 | 0.00           | 0.335                             | 3 |
| 4  | 1            | 14 | 17 | 0.00           | 0.335                             | 3 |
| 2  | 1            | 4  | 13 | 0.00           | 0.335                             | 3 |
| 2  | 1            | 4  | 12 | 0.00           | 0.335                             | 3 |
| 2  | 1            | 4  | 5  | 0.00           | 0.335                             | 3 |
| 3  | 1            | 4  | 13 | 0.00           | 0.335                             | 3 |
| 3  | 1            | 4  | 12 | 0.00           | 0.335                             | 3 |

|    |    |    |    |        |        |   |
|----|----|----|----|--------|--------|---|
| 3  | 1  | 4  | 5  | 0.00   | 0.335  | 3 |
| 14 | 1  | 4  | 13 | 0.00   | 0.335  | 3 |
| 14 | 1  | 4  | 12 | 0.00   | 0.335  | 3 |
| 14 | 1  | 4  | 5  | 0.00   | 0.335  | 3 |
| 1  | 14 | 15 | 18 | 0.00   | 2.510  | 2 |
| 1  | 14 | 15 | 19 | 0.00   | 2.510  | 2 |
| 1  | 14 | 15 | 20 | 0.00   | 0.000  | 1 |
| 16 | 14 | 15 | 18 | 180.00 | 10.500 | 2 |
| 16 | 14 | 15 | 19 | 180.00 | 10.500 | 2 |
| 16 | 14 | 15 | 20 | 180.00 | 0.000  | 2 |
| 17 | 14 | 15 | 18 | 180.00 | 10.500 | 2 |
| 17 | 14 | 15 | 19 | 180.00 | 10.500 | 2 |
| 17 | 14 | 15 | 20 | 180.00 | 0.000  | 2 |
| 14 | 15 | 20 | 21 | 0.00   | 5.440  | 1 |
| 18 | 15 | 20 | 21 | 0.00   | 1.260  | 2 |
| 19 | 15 | 20 | 21 | 0.00   | 1.260  | 2 |

### Chlorine

| # | q         | $\sigma_{ii} / \text{\AA}$ | $\epsilon_{ii} / \text{kJ mol}^{-1}$ |
|---|-----------|----------------------------|--------------------------------------|
| 1 | -0.684915 | 3.5000                     | 0.9276                               |

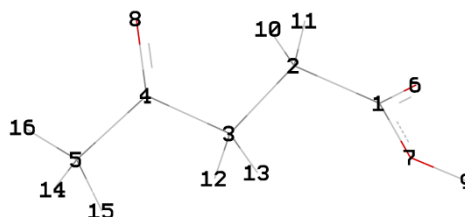

### LEV

#### LEV\_1

| #  | q         | $\sigma_{ii} / \text{\AA}$ | $\epsilon_{ii} / \text{kJ mol}^{-1}$ |
|----|-----------|----------------------------|--------------------------------------|
| 1  | 0.842712  | 3.56359                    | 0.460240                             |
| 2  | -0.174511 | 3.87541                    | 0.230120                             |
| 3  | -0.011592 | 3.87541                    | 0.230120                             |
| 4  | 0.625023  | 3.56359                    | 0.460240                             |
| 5  | -0.359483 | 3.87541                    | 0.230120                             |
| 6  | -0.681608 | 3.02905                    | 0.502080                             |
| 7  | -0.664781 | 3.15378                    | 0.636386                             |
| 8  | -0.540244 | 3.02905                    | 0.502080                             |
| 9  | 0.459424  | 0.40001                    | 0.192464                             |
| 10 | 0.047030  | 2.35197                    | 0.092048                             |
| 11 | 0.065710  | 2.35197                    | 0.092048                             |
| 12 | 0.003217  | 2.35197                    | 0.092048                             |
| 13 | 0.038073  | 2.35197                    | 0.092048                             |
| 14 | 0.093589  | 2.35197                    | 0.092048                             |
| 15 | 0.083983  | 2.35197                    | 0.092048                             |
| 16 | 0.107231  | 2.35197                    | 0.092048                             |

## LEV\_2

| #  | q         | $\sigma_{ii} / \text{\AA}$ | $\epsilon_{ii} / \text{kJ mol}^{-1}$ |
|----|-----------|----------------------------|--------------------------------------|
| 1  | 0.813266  | 3.56359                    | 0.460240                             |
| 2  | -0.172891 | 3.87541                    | 0.230120                             |
| 3  | -0.019347 | 3.87541                    | 0.230120                             |
| 4  | 0.629431  | 3.56359                    | 0.460240                             |
| 5  | -0.362507 | 3.87541                    | 0.230120                             |
| 6  | -0.662318 | 3.02905                    | 0.502080                             |
| 7  | -0.617997 | 3.15378                    | 0.636386                             |
| 8  | -0.542801 | 3.02905                    | 0.502080                             |
| 9  | 0.412877  | 0.40001                    | 0.192464                             |
| 10 | 0.067413  | 2.35197                    | 0.092048                             |
| 11 | 0.047718  | 2.35197                    | 0.092048                             |
| 12 | 0.035982  | 2.35197                    | 0.092048                             |
| 13 | 0.009219  | 2.35197                    | 0.092048                             |
| 14 | 0.086208  | 2.35197                    | 0.092048                             |
| 15 | 0.093383  | 2.35197                    | 0.092048                             |
| 16 | 0.108096  | 2.35197                    | 0.092048                             |

## LEV\_1 and LEV\_2

# Bonds

| Atom Numbers | $r_{eq} / \text{\AA}$ | $k_r / \text{kJ mol}^{-1} \text{\AA}^{-2}$ |
|--------------|-----------------------|--------------------------------------------|
| 1 7          | 1.3550                | 1746.7                                     |
| 1 6          | 1.2220                | 3899.3                                     |
| 1 2          | 1.4920                | 1261.6                                     |
| 2 3          | 1.5080                | 1282.1                                     |
| 2 11         | 1.0930                | 1435.1                                     |
| 2 10         | 1.0930                | 1435.1                                     |
| 3 12         | 1.0930                | 1435.1                                     |
| 3 13         | 1.0930                | 1435.1                                     |
| 3 4          | 1.4920                | 1261.6                                     |
| 4 8          | 1.2220                | 3899.3                                     |
| 4 5          | 1.4920                | 1261.6                                     |
| 5 15         | 1.0930                | 1435.1                                     |
| 5 14         | 1.0930                | 1435.1                                     |
| 5 16         | 1.0930                | 1435.1                                     |
| 7 9          | 0.9810                | 2229.1                                     |

# Angles

| Atom Numbers | $\theta_{eq} / \text{deg}$ | $k_{\theta} / \text{kJ mol}^{-1} \text{rad}^{-2}$ |
|--------------|----------------------------|---------------------------------------------------|
| 6 1 2        | 124.41                     | 282.44                                            |
| 7 1 2        | 109.72                     | 314.05                                            |
| 7 1 6        | 124.43                     | 347.78                                            |
| 1 2 3        | 107.52                     | 233.96                                            |
| 1 2 10       | 108.39                     | 195.72                                            |
| 1 2 11       | 108.39                     | 195.72                                            |
| 3 2 10       | 110.55                     | 191.50                                            |
| 3 2 11       | 110.55                     | 191.50                                            |
| 11 2 10      | 108.84                     | 155.37                                            |
| 2 3 4        | 107.52                     | 233.96                                            |
| 2 3 12       | 110.55                     | 191.50                                            |
| 2 3 13       | 110.55                     | 191.50                                            |
| 12 3 4       | 108.39                     | 195.72                                            |
| 13 3 4       | 108.39                     | 195.72                                            |
| 12 3 13      | 108.84                     | 155.37                                            |
| 3 4 5        | 118.02                     | 346.57                                            |
| 3 4 8        | 124.41                     | 282.44                                            |
| 8 4 5        | 124.41                     | 282.44                                            |
| 4 5 14       | 108.39                     | 195.72                                            |
| 4 5 15       | 108.39                     | 195.72                                            |
| 4 5 16       | 108.39                     | 195.72                                            |
| 15 5 14      | 108.84                     | 155.37                                            |
| 14 5 16      | 108.84                     | 155.37                                            |
| 15 5 16      | 108.84                     | 155.37                                            |
| 1 7 9        | 111.95                     | 175.55                                            |

| # Dihedrals |              |   |    |                |                                   |   |
|-------------|--------------|---|----|----------------|-----------------------------------|---|
|             | Atom Numbers |   |    | $\delta$ / deg | $k_{\phi}$ / kJ mol <sup>-1</sup> | m |
| 1           | 2            | 3 | 4  | 0              | 0.9288                            | 1 |
| 1           | 2            | 3 | 4  | 0              | -2.3849                           | 3 |
| 1           | 2            | 3 | 12 | 0              | -0.5356                           | 1 |
| 1           | 2            | 3 | 12 | 180            | 0.1213                            | 2 |
| 1           | 2            | 3 | 13 | 0              | -0.5356                           | 1 |
| 1           | 2            | 3 | 13 | 180            | 0.1213                            | 2 |
| 2           | 1            | 7 | 9  | 0              | -2.4393                           | 1 |
| 2           | 1            | 7 | 9  | 180            | 10.6232                           | 2 |
| 2           | 1            | 7 | 9  | 0              | -1.1422                           | 3 |
| 2           | 3            | 4 | 5  | 0              | 0.2134                            | 1 |
| 2           | 3            | 4 | 5  | 180            | 0.3682                            | 2 |
| 2           | 3            | 4 | 5  | 0              | 1.1422                            | 3 |
| 2           | 3            | 4 | 8  | 0              | 1.7238                            | 1 |
| 2           | 3            | 4 | 8  | 180            | 0.2929                            | 2 |
| 2           | 3            | 4 | 8  | 0              | 0.6820                            | 3 |
| 3           | 2            | 1 | 6  | 0              | 1.7238                            | 1 |
| 3           | 2            | 1 | 6  | 180            | 0.2929                            | 2 |
| 3           | 2            | 1 | 6  | 0              | 0.6820                            | 3 |
| 3           | 2            | 1 | 7  | 0              | -0.2469                           | 1 |
| 3           | 2            | 1 | 7  | 180            | -0.6987                           | 2 |
| 3           | 2            | 1 | 7  | 0              | 0.4226                            | 3 |
| 3           | 4            | 5 | 14 | 0              | -0.1506                           | 1 |
| 3           | 4            | 5 | 14 | 180            | 0.1799                            | 2 |
| 3           | 4            | 5 | 14 | 0              | 1.1129                            | 3 |
| 3           | 4            | 5 | 15 | 0              | -0.1506                           | 1 |
| 3           | 4            | 5 | 15 | 180            | 0.1799                            | 2 |
| 3           | 4            | 5 | 15 | 0              | 1.1129                            | 3 |
| 3           | 4            | 5 | 16 | 0              | -0.1506                           | 1 |
| 3           | 4            | 5 | 16 | 180            | 0.1799                            | 2 |
| 3           | 4            | 5 | 16 | 0              | 1.1129                            | 3 |
| 4           | 3            | 2 | 10 | 0              | -0.5356                           | 1 |
| 4           | 3            | 2 | 10 | 180            | 0.1213                            | 2 |
| 4           | 3            | 2 | 11 | 0              | -0.5356                           | 1 |
| 4           | 3            | 2 | 11 | 180            | 0.1213                            | 2 |
| 5           | 4            | 3 | 12 | 0              | -0.1506                           | 1 |
| 5           | 4            | 3 | 12 | 180            | 0.1799                            | 2 |
| 5           | 4            | 3 | 12 | 0              | 1.1129                            | 3 |
| 5           | 4            | 3 | 13 | 0              | -0.1506                           | 1 |
| 5           | 4            | 3 | 13 | 180            | 0.1799                            | 2 |
| 5           | 4            | 3 | 13 | 0              | 1.1129                            | 3 |
| 6           | 1            | 2 | 10 | 0              | 1.3807                            | 1 |
| 6           | 1            | 2 | 10 | 180            | -2.9455                           | 2 |
| 6           | 1            | 2 | 10 | 0              | 0.6443                            | 3 |
| 6           | 1            | 2 | 11 | 0              | 1.3807                            | 1 |
| 6           | 1            | 2 | 11 | 180            | -2.9455                           | 2 |
| 6           | 1            | 2 | 11 | 0              | 0.6443                            | 3 |
| 6           | 1            | 7 | 9  | 0              | 3.4769                            | 1 |
| 6           | 1            | 7 | 9  | 180            | 12.8700                           | 2 |
| 6           | 1            | 7 | 9  | 0              | -0.1213                           | 3 |
| 7           | 1            | 2 | 10 | 180            | -1.3054                           | 2 |
| 7           | 1            | 2 | 10 | 0              | 0.6904                            | 3 |
| 7           | 1            | 2 | 11 | 180            | -1.3054                           | 2 |
| 7           | 1            | 2 | 11 | 0              | 0.6904                            | 3 |
| 8           | 4            | 3 | 12 | 0              | 1.3807                            | 1 |
| 8           | 4            | 3 | 12 | 180            | -2.9455                           | 2 |
| 8           | 4            | 3 | 12 | 0              | 0.6443                            | 3 |
| 8           | 4            | 3 | 13 | 0              | 1.3807                            | 1 |
| 8           | 4            | 3 | 13 | 180            | -2.9455                           | 2 |
| 8           | 4            | 3 | 13 | 0              | 0.6443                            | 3 |
| 8           | 4            | 5 | 14 | 0              | 1.3807                            | 1 |
| 8           | 4            | 5 | 14 | 180            | -2.9455                           | 2 |
| 8           | 4            | 5 | 14 | 0              | 0.6443                            | 3 |
| 8           | 4            | 5 | 15 | 0              | 1.3807                            | 1 |
| 8           | 4            | 5 | 15 | 180            | -2.9455                           | 2 |
| 8           | 4            | 5 | 15 | 0              | 0.6443                            | 3 |
| 8           | 4            | 5 | 16 | 0              | 1.3807                            | 1 |

|    |   |   |    |     |         |   |
|----|---|---|----|-----|---------|---|
| 8  | 4 | 5 | 16 | 180 | -2.9455 | 2 |
| 8  | 4 | 5 | 16 | 0   | 0.6443  | 3 |
| 10 | 2 | 3 | 12 | 0   | 0.5941  | 1 |
| 10 | 2 | 3 | 12 | 180 | -2.8995 | 2 |
| 10 | 2 | 3 | 12 | 0   | 0.6569  | 3 |
| 10 | 2 | 3 | 13 | 0   | 0.5941  | 1 |
| 10 | 2 | 3 | 13 | 180 | -2.8995 | 2 |
| 10 | 2 | 3 | 13 | 0   | 0.6569  | 3 |
| 11 | 2 | 3 | 12 | 0   | 0.5941  | 1 |
| 11 | 2 | 3 | 12 | 180 | -2.8995 | 2 |
| 11 | 2 | 3 | 12 | 0   | 0.6569  | 3 |
| 11 | 2 | 3 | 13 | 0   | 0.5941  | 1 |
| 11 | 2 | 3 | 13 | 180 | -2.8995 | 2 |
| 11 | 2 | 3 | 13 | 0   | 0.6569  | 3 |

# improper

|   | Atom Numbers |   |   | $\phi_0 / \text{deg}$ | $k_\phi / \text{kJ mol}^{-1} \text{rad}^{-2}$ |
|---|--------------|---|---|-----------------------|-----------------------------------------------|
| 1 | 2            | 6 | 7 | 0.                    | 42.455                                        |
| 4 | 3            | 5 | 8 | 0.                    | 43.961                                        |

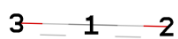

**CO<sub>2</sub>**

| # | <b>q</b> | $\sigma_{ii} / \text{\AA}$ | $\epsilon_{ii} / \text{kJ mol}^{-1}$ |
|---|----------|----------------------------|--------------------------------------|
| 1 | 0.7000   | 3.14290                    | 0.221800                             |
| 2 | -0.3500  | 3.42350                    | 0.656900                             |
| 3 | -0.3500  | 3.42350                    | 0.656900                             |

# Bonds

| Atom Numbers |   | $r_{eq} / \text{\AA}$ | $k_r / \text{kJ mol}^{-1} \text{\AA}^{-2}$ |
|--------------|---|-----------------------|--------------------------------------------|
| 1            | 2 | 1.16000               | 4309.50                                    |
| 1            | 3 | 1.16000               | 4309.50                                    |

# Angles

| Atom Numbers |   |   | $\theta_{eq} / \text{deg}$ | $k_\theta / \text{kJ mol}^{-1} \text{rad}^{-2}$ |
|--------------|---|---|----------------------------|-------------------------------------------------|
| 2            | 1 | 3 | 180.0000                   | 234.30                                          |

---



**Table S2. Samples used for molecular dynamics simulations of CHCL\_LEV\_1\_2 DES + CO<sub>2</sub> systems. All simulations were carried out at 298 K and for the pressures reported for each system.**

| name                            | $p$ / MPa | $N_{[\text{CH}][\text{Cl}]}$ | $N_{\text{LEV}}$ | $N_{\text{CO}_2}$ |
|---------------------------------|-----------|------------------------------|------------------|-------------------|
| CHCl_LEV_1_2_CO <sub>2</sub> _I | 0.1       | 250                          | 500              | 9                 |
| CHCl_LEV_1_2_CO <sub>2</sub> _I | 0.4       | 250                          | 500              | 37                |
| CHCl_LEV_1_2_CO <sub>2</sub> _I | 0.7       | 250                          | 500              | 69                |
| CHCl_LEV_1_2_CO <sub>2</sub> _I | 1.0       | 250                          | 500              | 105               |

**Table S3. Density,  $\rho$ , refraction index (for sodium D-line),  $n_D$ , and viscosity,  $\eta$ , data for CHCL\_LEV\_1\_2 DES synthesized in this work.**

| $T$ / K | $\rho$ / g $\times$ cm <sup>-3</sup> | $\eta$ / mPa $\times$ s | $n_D$   |
|---------|--------------------------------------|-------------------------|---------|
| 293.18  | 1.14044                              |                         |         |
| 298.13  | 1.13709                              | 171.3                   | 1.46618 |
| 303.13  | 1.13370                              | 118.7                   | 1.46483 |
| 308.13  | 1.13031                              | 87.1                    | 1.46340 |
| 313.13  | 1.12694                              | 64.6                    | 1.46195 |
| 318.13  | 1.12359                              | 50.6                    | 1.46055 |
| 323.13  | 1.12025                              | 40.7                    | 1.45916 |
| 328.13  | 1.11693                              | 33.0                    | 1.45765 |
| 333.12  | 1.11362                              | 26.3                    | 1.45630 |
| 338.13  | 1.11032                              | 22.1                    | 1.45494 |
| 343.13  | 1.10705                              | 18.9                    |         |
| 348.13  | 1.10378                              | 16.1                    |         |
| 353.13  | 1.10053                              |                         |         |
| 358.13  | 1.09729                              |                         |         |
| 363.12  | 1.09406                              |                         |         |

Table S4.  $^1\text{H}$  and  $^{13}\text{C}$  NMR chemical shifts,  $\delta$ , for CHCL\_LEV\_1\_2 synthesized in this work.

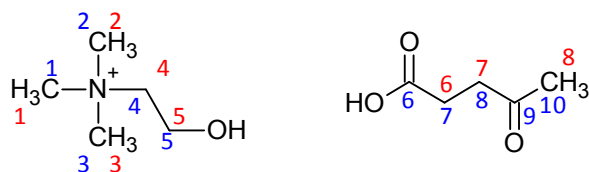

| atoms | $\delta$ / ppm |                 |       |
|-------|----------------|-----------------|-------|
|       | $^1\text{H}$   | $^{13}\text{C}$ |       |
| 1,2,3 | 3.12           | 53.9            |       |
| 4     | 3.43           | 55.7            |       |
| 5     | 3.97           | 67.8            |       |
| 6     | 2.79           | 213.9           |       |
| 7     | 2.51           | 38.0            |       |
| 8     | 2.16           | 29.6            |       |
|       |                | 9               | 177.5 |
|       |                | 10              | 27.8  |

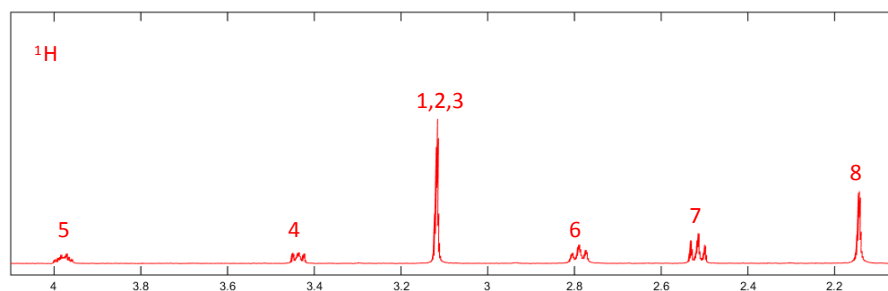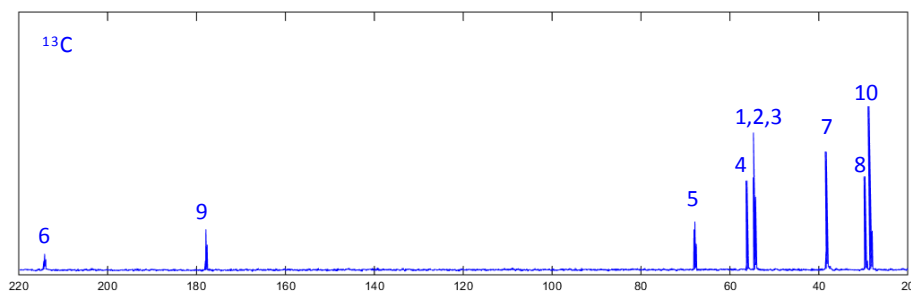

$\delta$  / ppm

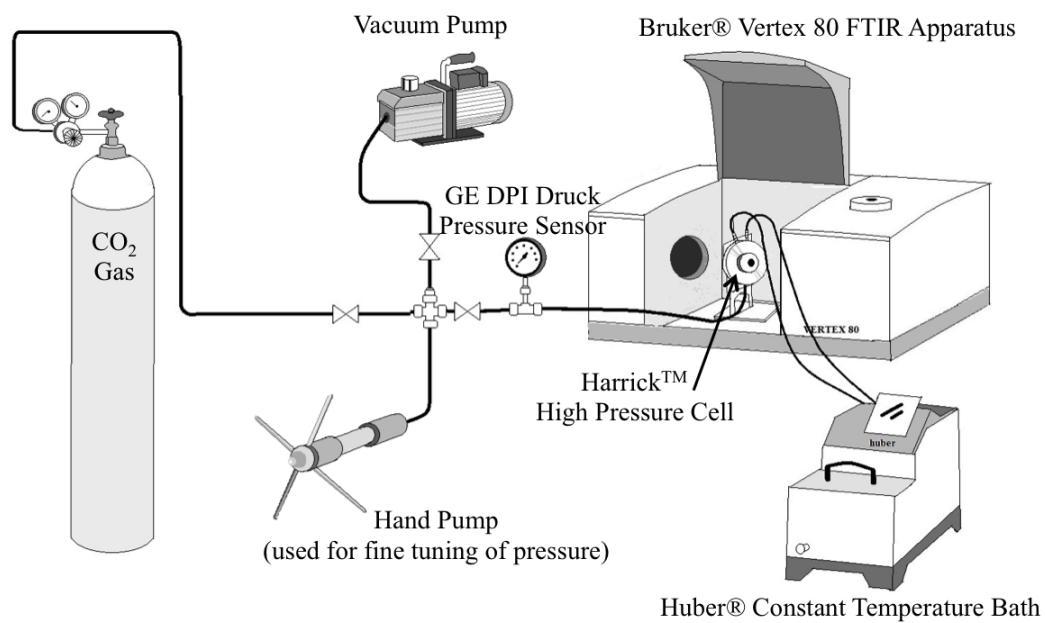

**Figure S1.** In-situ FTIR experimental setup schematics.

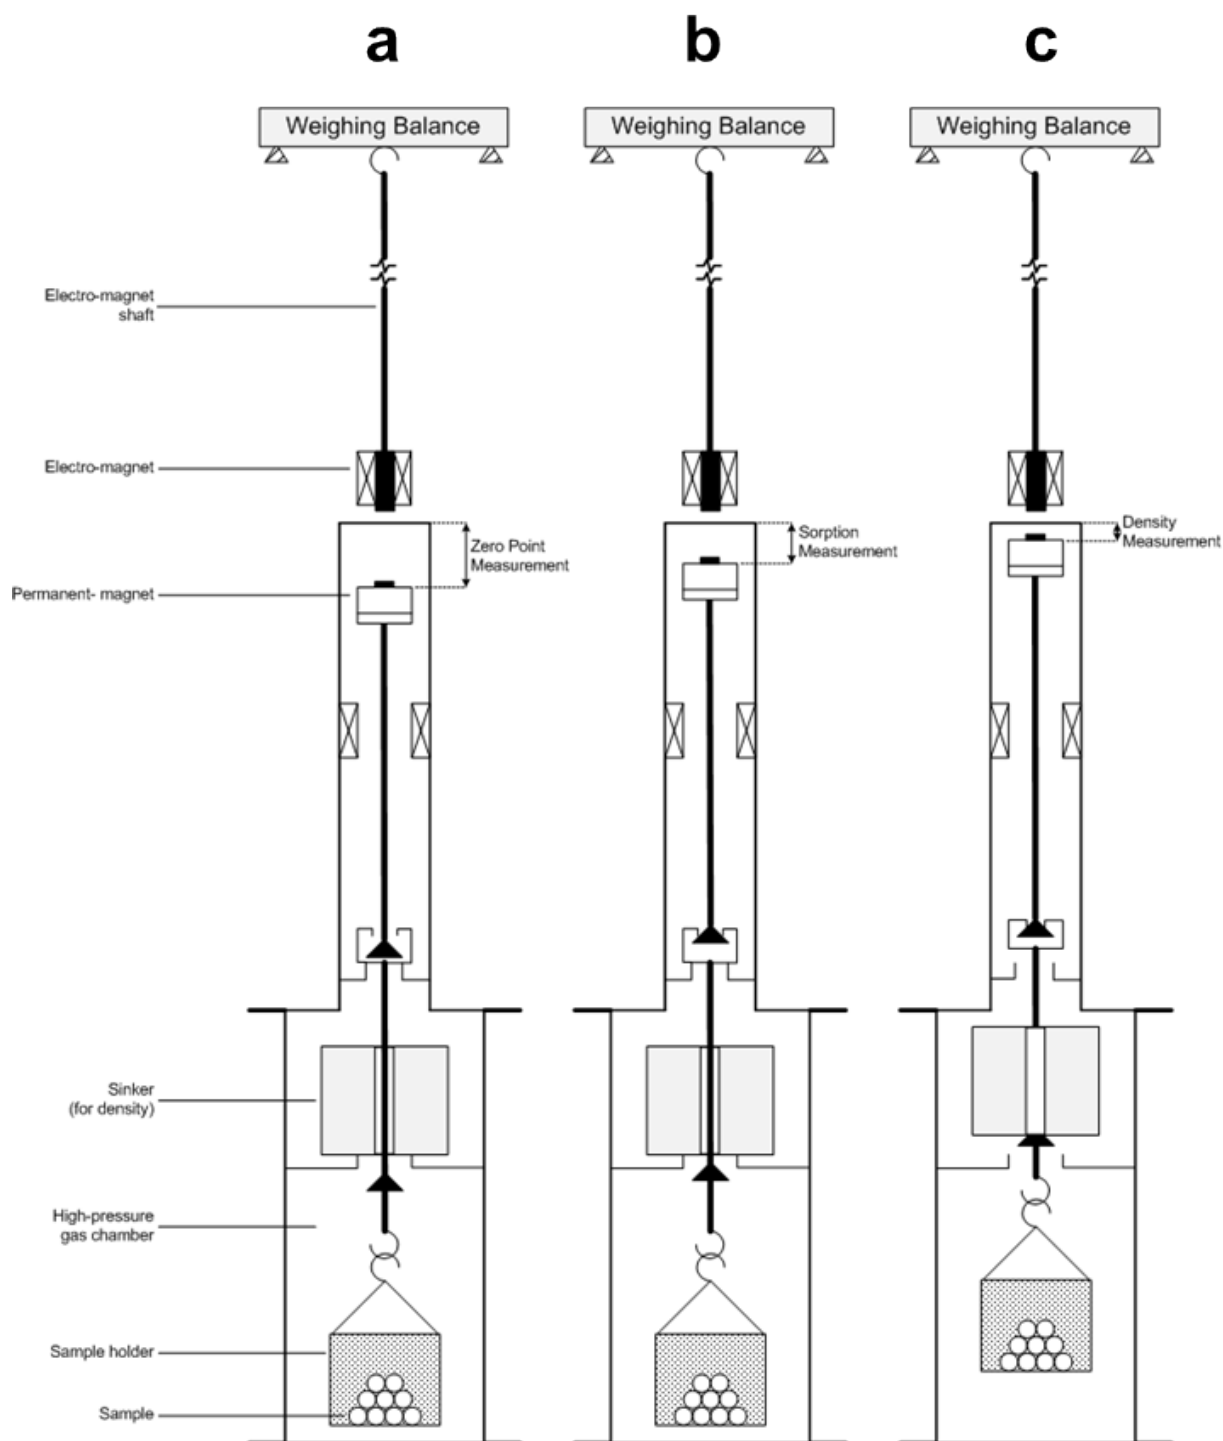

**Figure S2.** Gas absorption apparatus (MSA) schematics and its operating principle. (a) sample loaded to measuring basket in high pressure cell; (b) Measurement point 1 (MP1) - magnetic coupling is on and mass of the sample is measured; (c) Measurement point 2 (MP2) – in-situ density of the adsorbed gas is measured.

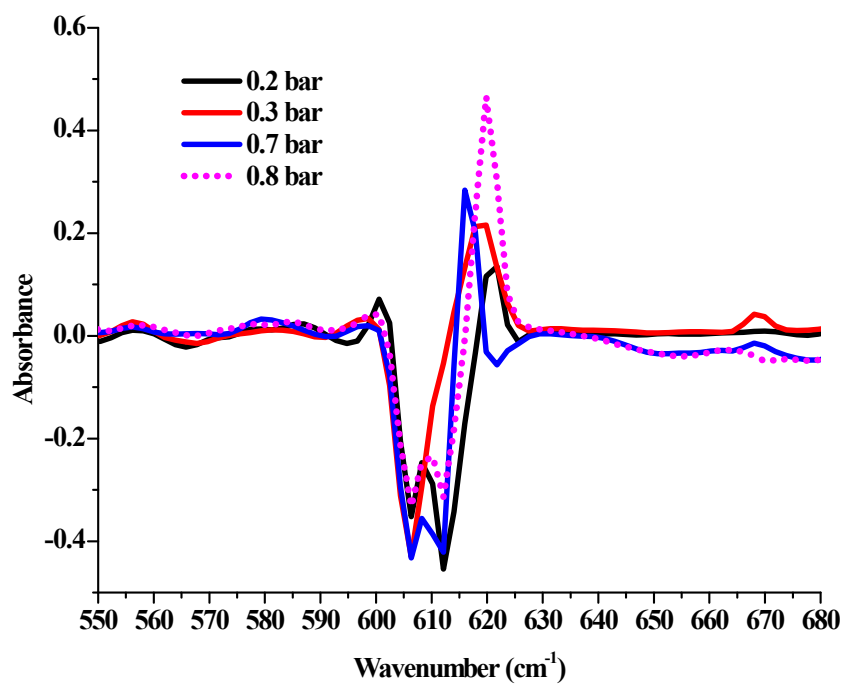

**Figure S3.**

**Figure S3.** In-situ FTIR experimental findings of CHCL\_LEV\_1\_2 DES with the presence of pressurized CO<sub>2</sub> at different pressures.
